# Supplementary material for: Identification of an Autophagy-Related lncRNA Prognostic Signature and Related Tumor Immunity Research in Lung Adenocarcinoma
Source: Frontiers journal article supplement (doi:10.3389/fgene.2021.767694), 2021-12-08
Supplement: Table_1.docx [file Table_1.docx]

## Table 1. The regression coefficient of each ARlncRNA included by the multivariate Cox analysis.

| ID | Coef | HR |
| --- | --- | --- |
| AC093673.1 | 0.031656013 | 1.032162394 |
| CARD8-AS1 | -0.144812079 | 0.865184864 |
| AC060780.1 | 0.182095366 | 1.199728602 |
| AC123595.1 | -0.268233505 | 0.764729192 |
| UGDH-AS1 | -0.380154182 | 0.683755978 |
| LINC00996 | -0.392113955 | 0.675627119 |
| LINC00861 | 0.31943108 | 1.376344511 |
| AF131215.5 | -0.207575707 | 0.812551724 |
| AC008763.1 | -0.234324141 | 0.791105345 |
| AL136304.1 | -0.266108078 | 0.766356297 |
| AL606489.1 | 0.238386541 | 1.269199696 |
| HLA-DQB1-AS1 | -0.04503729 | 0.955961834 |
| LINC00654 | -0.195989673 | 0.822020724 |
| LINC00847 | -0.025910346 | 0.974422446 |
